# Supplementary material for: Feasibility and Safety of Pure Single-Port Robotic Surgery Using the "Integrated Functional Assistant Port" (iFAP) Technique: A Retrospective Cohort Study
Source: Research Square preprint supplement (doi:10.21203/rs.3.rs-8573310/v1), 2026-01-23
Supplement: Supplementary file 1 [file 7754093b53a7305ff5c5f0bd.xlsx]

## Sheet: 최신 형식은 위와 같이 unstructured abstr
Variable	Low Complexity (RENAL 4-6)	Moderate Complexity (RENAL 7-9)	p-value
N	13	13
RENAL Score	5.2 ± 0.8	7.2 ± 0.6	<0.001
Console Time (min)	96.1 ± 28.3	105.5 ± 38.9	0.486
Warm Ischemic Time (min)	23.4 ± 2.8	26.2 ± 2.0	0.007*
Final Incision (cm)	3.9 ± 1.2	4.2 ± 0.8	0.511
Complications, n (%)	1 (7.7%)	1 (7.7%)	>0.999
Specific Details	Hernia (1)	Ileus (1)
