# Supplementary material for: Feasibility and Safety of Pure Single-Port Robotic Surgery Using the "Integrated Functional Assistant Port" (iFAP) Technique: A Retrospective Cohort Study
Source: Research Square preprint supplement (doi:10.21203/rs.3.rs-8573310/v1), 2026-01-23
Supplement: Supplementary file 2 [file 91bd31d42251f952c0315943.xlsx]

## Sheet: 최신 형식은 위와 같이 unstructured abstr
Variable	Total (N=60)	Partial Nephrectomy (n=26)	Adrenal (n=13)	Nephroureterectomy (n=11)	Radical Nephrectomy (n=5)	Parrial cystectomy (n=3)	Others† (n=2)	p-value
Age (years)	59.7 ± 14.0	52.8 ± 12.5	60.5 ± 12.9	71.1 ± 11.2	70.0 ± 11.2	68.3 ± 2.5	50.5 ± 17.7	0.06
Gender (M/F)	36/24	18/8	2026-06-07	2026-08-03	2026-02-03	2026-02-01	0/2	0.24
ASA Score (I/II/III)	11/38/10	8/17/1	2002-08-03	2001-07-03	2000-03-02	2000-02-01	0/1/0	0.4
Approach (Trans/Retro)	40/20	15/11	13/0	2026-04-07	2026-01-04	3/0	2/0	0.1
Docking Time (min)	12.6 ± 6.6	12.3 ± 5.7	9.0 ± 3.4	15.6 ± 8.9	13.0 ± 6.1	10.4 ± 2.3	21.3 ± 4.1	0.06
Console Time (min)	102.4 ± 51.9	100.8 ± 33.7	55.4 ± 19.3	168.0 ± 57.8	126.7 ± 45.1	108.3 ± 14.2	122.0 ± 58.0	<0.001
Final Incision (cm)	4.7 ± 1.7	4.1 ± 1.0	4.2 ± 0.6	6.9 ± 2.2	4.8 ± 2.2	4.7 ± 2.1	3.3 ± 1.8	<0.001
Hospital Stay (days)	7.7 ± 4.1	6.5 ± 1.7	5.8 ± 1.9	10.5 ± 5.9	13.6 ± 7.7	7.7 ± 1.5	7.0 ± 0.0	<0.01
Complications, n (%)	2 (3.3%)	2 (7.7%)	0 (0.0%)	0 (0.0%)	0 (0.0%)	0 (0.0%)	0 (0.0%)	0.75
